# Supplementary material
Source: PubMed Central journal article supplement (PMC4235981)
Supplement: Supp_Fig1.pdf [file Supp_Fig1.pdf]

## Supplementary Data

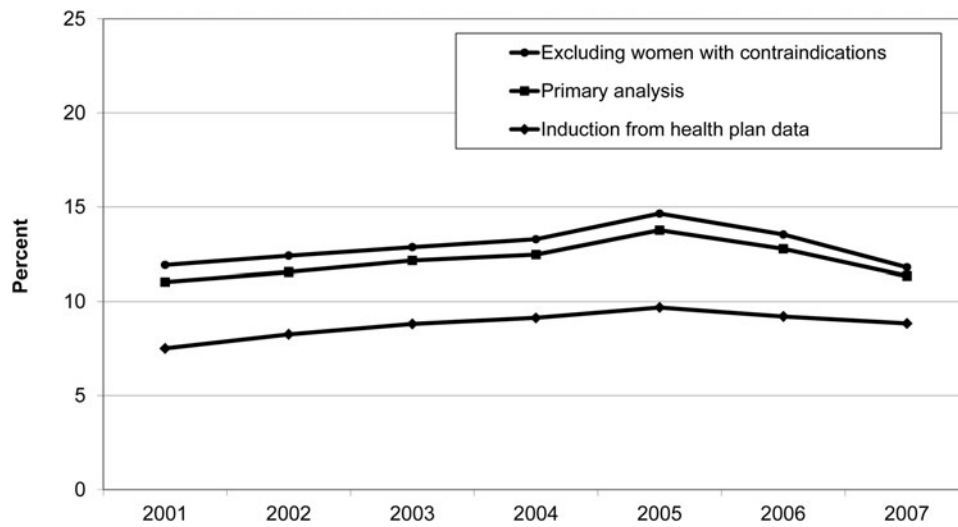

**SUPPLEMENTARY FIG. S1.** Prevalence of elective induction: sensitivity analyses. The middle line (squares) represents results from the primary analysis using the main cohort, with induction defined from both health plan and birth certificate data. The top line (circles) shows results limited to women without contraindications to induction (see Fig. 1 for a list of contraindications). The bottom line (diamonds) shows results with induction defined from only health plan data.
